# Supplementary material for: Withdrawal of Long-Term Nucleotide Analog Therapy in Chronic Hepatitis B: Outcomes From the Withdrawal Phase of the HBRN Immune Active Treatment Trial
Source: PubMed Central journal article supplement — Am J Gastroenterol. 2023 Jan 13;118(7):1226–36. doi: 10.14309/ajg.0000000000002176 (PMC10298187; doi:10.14309/ajg.0000000000002176), 2023-01-13
Supplement: acg-118-1226-s002.pdf [file acg-118-1226-s002.pdf]

**Supplemental Figure 2.**

Case plots for 2 participants who were HBeAg+ at the time of TDF withdrawal with severe icteric hepatitis flares.

**Case=1; Genotype= Unspecified non-A; HBeAg= Positive; Cirr= Absent;**

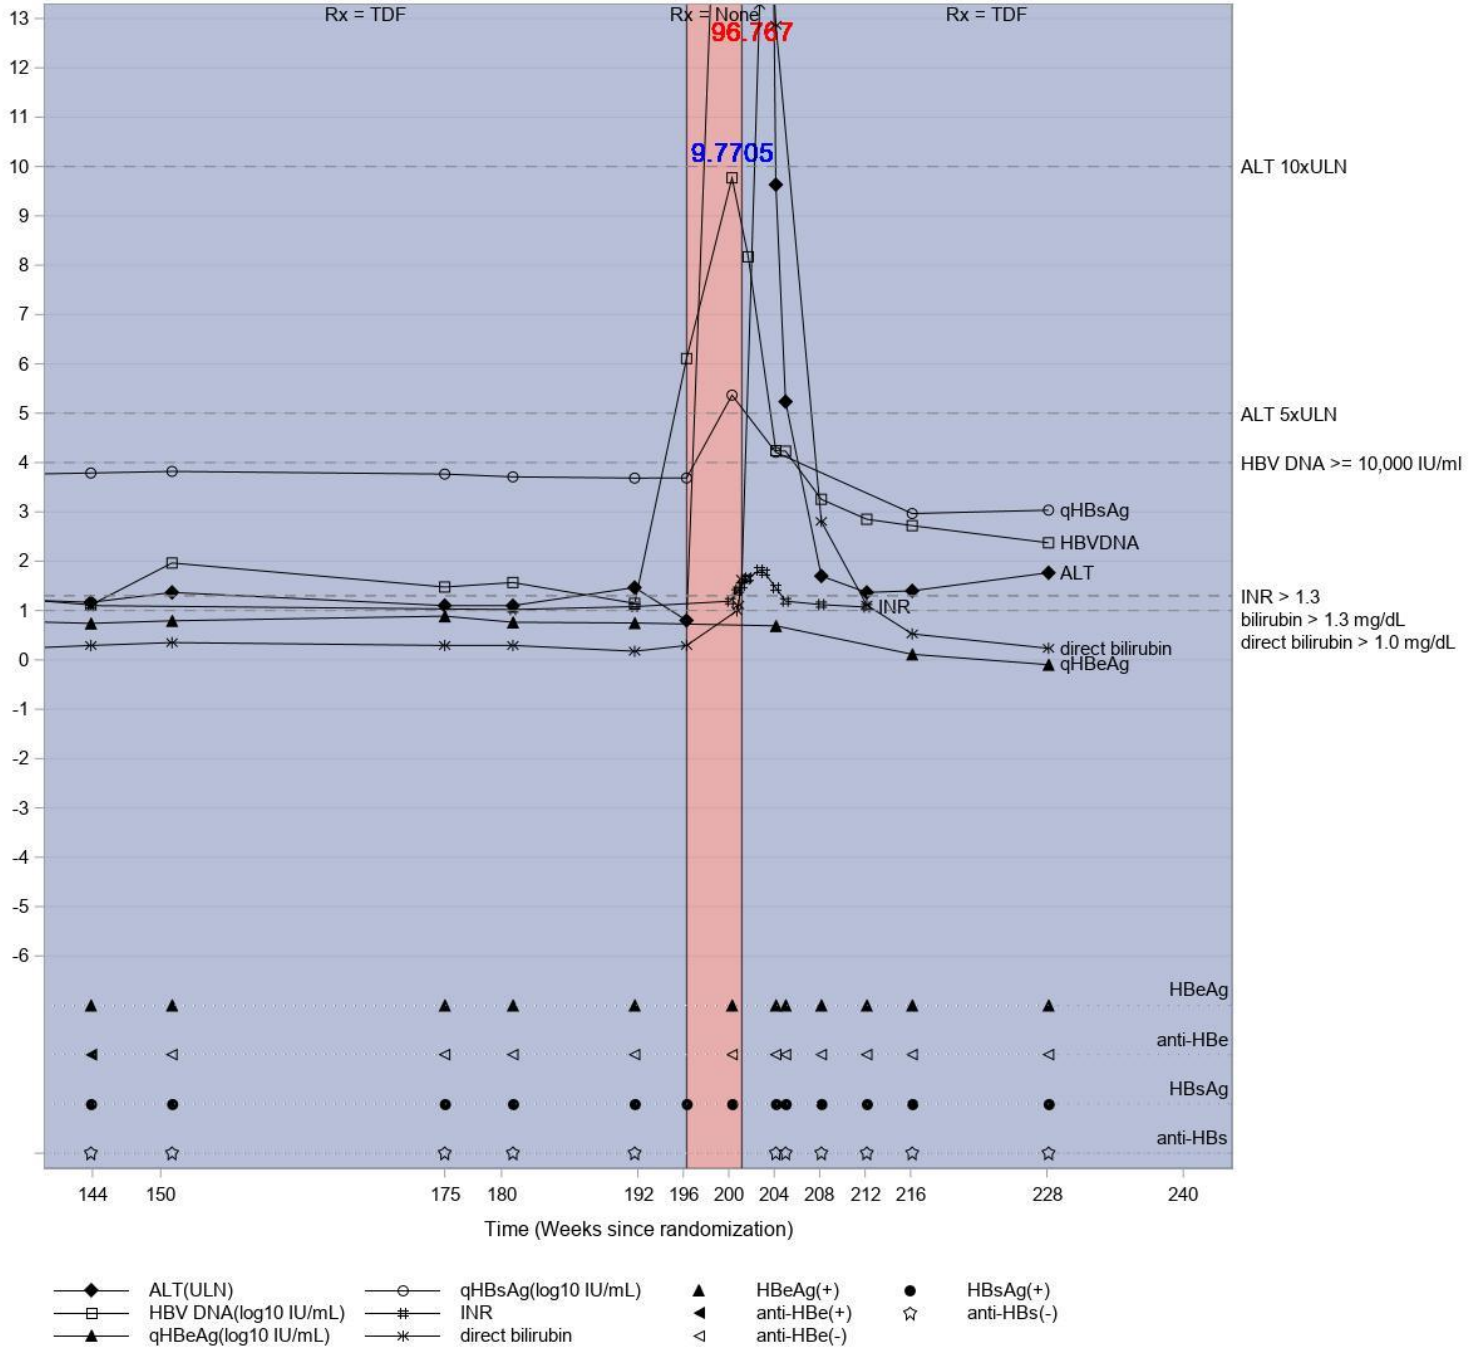

Case=2; Genotype= Unspecified non-A; HBeAg= Positive; Cirr= Absent;

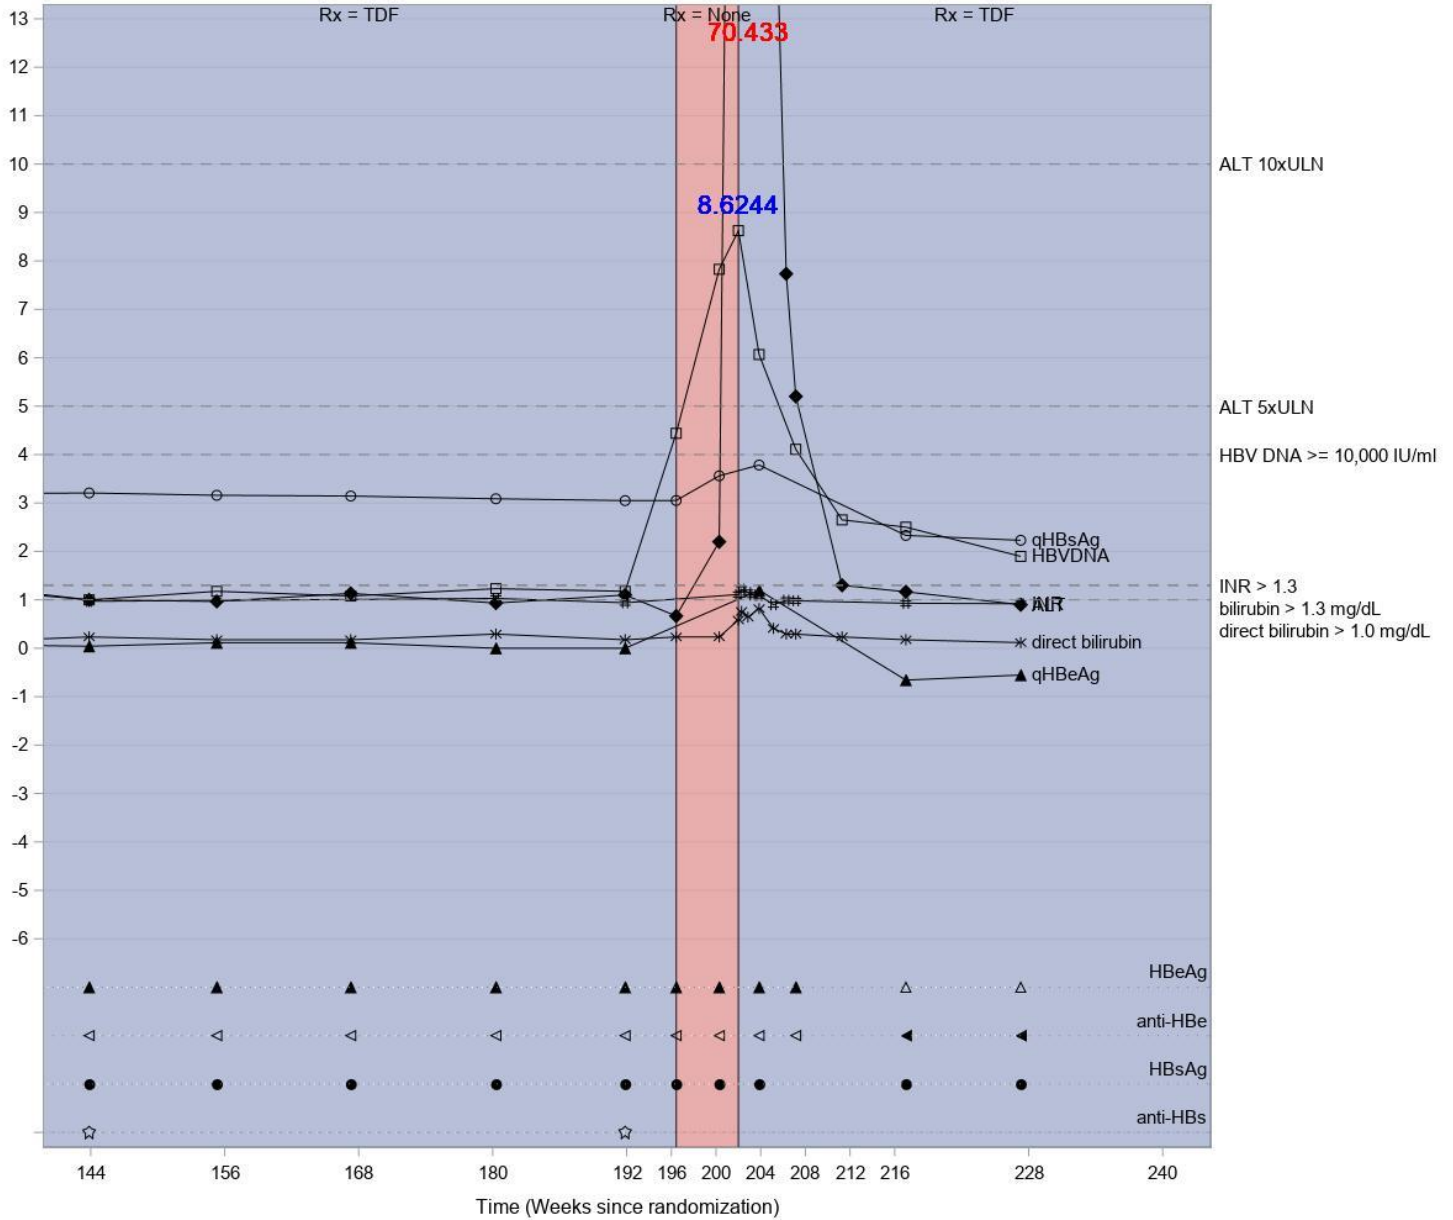

- |                        |                       |               |               |
|------------------------|-----------------------|---------------|---------------|
| ◆ ALT(ULN)             | ○ qHBsAg(log10 IU/mL) | ▲ HBeAg(+)    | ◁ anti-HBe(-) |
| ◻ HBV DNA(log10 IU/mL) | # INR                 | △ HBeAg(-)    | ● HBsAg(+)    |
| ▲ qHBeAg(log10 IU/mL)  | * direct bilirubin    | ◀ anti-HBe(+) | ☆ anti-HBs(-) |
