# Supplementary material for: Withdrawal of Long-Term Nucleotide Analog Therapy in Chronic Hepatitis B: Outcomes From the Withdrawal Phase of the HBRN Immune Active Treatment Trial
Source: PubMed Central journal article supplement — Am J Gastroenterol. 2023 Jan 13;118(7):1226–36. doi: 10.14309/ajg.0000000000002176 (PMC10298187; doi:10.14309/ajg.0000000000002176), 2023-01-13
Supplement: acg-118-1226-s004.pdf [file acg-118-1226-s004.pdf]

**Supplemental Table 1. Characteristics of participants experiencing HBeAg seroreversion after treatment withdrawal.**

| ID | Study Arm  | HBeAg at baseline | HBeAg at week 192 | HBV Genotype | Time of HBeAg seroreversion since withdrawal (weeks) | ALT Elevation | Time of ALT elevation since withdrawal (weeks) | Grade 3+ (5x ULN) ALT elevation | Restart treatment after withdrawal | Time of treatment restart since withdrawal (weeks) |
|----|------------|-------------------|-------------------|--------------|------------------------------------------------------|---------------|------------------------------------------------|---------------------------------|------------------------------------|----------------------------------------------------|
| 1  | TDF        | Pos               | Neg               | C1           | 37                                                   | No            | ---                                            | No                              | No                                 | ---                                                |
| 2  | TDF        | Pos               | Neg               | A2           | 11                                                   | Yes           | 11                                             | Yes                             | Yes                                | 13.6                                               |
| 3  | TDF        | Pos               | Neg               | A2           | 11                                                   | Yes           | 11                                             | No                              | No                                 | ---                                                |
| 4  | TDF+PegIFN | Pos               | Neg               | A1           | 15.6                                                 | Yes           | 18.4                                           | Yes                             | No                                 | ---                                                |
| 5  | TDF+PegIFN | Pos               | Neg               | C1           | 9.1                                                  | Yes           | 9                                              | Yes                             | Yes                                | 9.1                                                |
| 6  | TDF        | Pos               | Neg               | B4           | 9                                                    | Yes           | 9                                              | Yes                             | Yes                                | 10                                                 |

--- Not applicable

**Supplemental Table 2. Association of ALT elevations with qHBsAg decline between TDF withdrawal (Week 192) and one year after withdrawal (Week 240)**

|                                        | qHBsAg (log 10 IU/ml) change from withdrawal (week 192) to week 240 (negative values indicate decline) |           |           |
|----------------------------------------|--------------------------------------------------------------------------------------------------------|-----------|-----------|
| <b>ALT elevation status</b>            | Least Square Mean                                                                                      | 95% Lower | 95% Upper |
| 1 None                                 | -0.23                                                                                                  | -0.45     | -0.01     |
| 2 ALT elevation but < 5 X ULN          | -0.38                                                                                                  | -0.61     | -0.14     |
| 3 ALT flare                            | -0.17                                                                                                  | -0.39     | 0.04      |
| <b>Pair-wise comparison of p-value</b> |                                                                                                        |           |           |
| 1 vs 2                                 | 0.38                                                                                                   |           |           |
| 1 vs 3                                 | 0.72                                                                                                   |           |           |
| 2 vs 3                                 | 0.22                                                                                                   |           |           |

**Supplemental Table 3. Factors associated with treatment restart (univariable analysis)**

| Variable                                              | Hazard Ratio and 95% CI | P    |
|-------------------------------------------------------|-------------------------|------|
| Tenofovir vs. Tenofovir+ peg-interferon               | 1.41 (0.47,4.19)        | 0.54 |
| Female vs. Male                                       | 1.22 (0.40,3.74)        | 0.73 |
| Others vs. Asian                                      | 0.35 (0.05,2.67)        | 0.31 |
| Age at week 192 (per year)                            | 1.03 (0.99,1.08)        | 0.18 |
| <b>At study entry (pre-treatment)</b>                 |                         |      |
| HBeAg at baseline (Positive vs. Negative)             | 3.60 (1.21,10.72)       | 0.02 |
| ALT at baseline (per ULN)                             | 0.99 (0.92,1.08)        | 0.87 |
| HBV DNA Baseline (per log 10)                         | 1.52 (1.04,2.24)        | 0.03 |
| qHBsAg Baseline (per log 10)                          | 1.17 (0.55,2.52)        | 0.68 |
| <b>At Treatment Withdrawal</b>                        |                         |      |
| ALT at 192 (per ULN)                                  | 0.60 (0.18,1.98)        | 0.40 |
| HBV DNA 192 (per log 10)                              | 1.06 (0.37,3.01)        | 0.91 |
| qHBsAg 192 (per log 10)                               | 1.10 (0.60,2.05)        | 0.76 |
| qHBsAg decline from baseline to week 192 (per log 10) | 0.99 (0.45,2.18)        | 0.98 |

**Supplemental Table 4. Association of pre-withdrawal factors with safe TDF withdrawal (no ALT flare, no treatment restart, and no transition to immune active phase one year after withdrawal)**

| <b>Variable</b>                              | <b>Odds Ratio (95% CI)</b> | <b>P-value</b> |
|----------------------------------------------|----------------------------|----------------|
| Tenofovir+ peg-interferon vs. Tenofovir*     | 1.56 (0.65, 3.76)          | 0.32           |
| Age at study entry (per year)                | 0.94 (0.90, 0.98)          | 0.01           |
| HBeAg Baseline (Positive vs. Negative)       | 0.77 (0.27, 2.18)          | 0.62           |
| ALT Baseline (X ULN)                         | 0.98 (0.92, 1.04)          | 0.50           |
| qHBsAg at week 192 (log <sub>10</sub> IU/mL) |                            | 0.049          |
| Within Tenofovir                             | 1.39 (0.63, 3.06)          | 0.42           |
| Within Tenofovir+ peg-interferon             | 0.49 (0.23, 1.00)          | 0.051          |

\*At the median value 2.91 log<sub>10</sub> IU/mL of qHBsAg at week 192
